# Supplementary material
Source: Springer Nature journal article supplement (https://www.springermedizin.de/resource/supplementary/12911_2011_556_MOESM1_ESM.pdf/9525832)

# Scenario 1

## A

### OP only

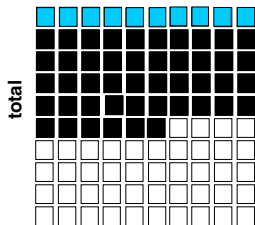

local recurrence

distant metastasis

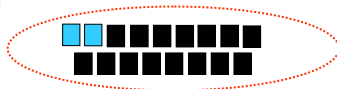

survival benefit in B: 5 %

nausea + vomiting

diarrhea

mucositis of oral mucosa

hair loss

## B

### OP + CTH for 1 year

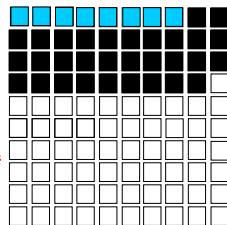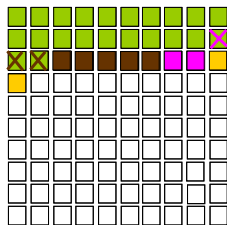

Supplement: MOESM1 [file 9525832]
